# Supplementary material for: Mitochondria-related core genes and TF-miRNA-hub mrDEGs network in breast cancer
Source: Oxford University Press journal article supplement (doi:10.1042/bsr20203481), 2021-01-01
Supplement: bsr-2020-3481_supp.pdf [file bsr-2020-3481_supp.pdf]

## Supplementary materials

# Mitochondria-related core genes and TF-miRNA-hub mrDEGs network in breast cancer

Li-rong Yan<sup>1</sup>, Ang Wang<sup>1</sup>, Zhi Lv<sup>1</sup>, Yuan Yuan<sup>1\*</sup>, Qian Xu<sup>1\*\*</sup>

<sup>1</sup>Tumor Etiology and Screening Department of Cancer Institute and General Surgery, The First Affiliated Hospital of China Medical University, Key Laboratory of Cancer Etiology and Prevention, China Medical University, Liaoning Provincial Education Department, Shenyang 110001, China.

**\*\*Corresponding author:** Dr. Qian Xu, Tumor Etiology and Screening Department of Cancer Institute and General Surgery, North Nanjing Street 155#, Heping District, Shenyang 110001, China  
Telephone : +86-024-83282153; fax: +86-024-83282383. Email : [qxu@cmu.edu.cn](mailto:qxu@cmu.edu.cn).

**\*Corresponding author:** Dr. Yuan Yuan, Tumor Etiology and Screening Department of Cancer Institute and General Surgery, North Nanjing Street 155#, Heping District, Shenyang 110001, China  
Telephone : +86-024-83282153; fax: +86-024-83282383. Email : [yuanyuan@cmu.edu.cn](mailto:yuanyuan@cmu.edu.cn)

## Content:

**Table S1 GO enrichment analysis of mitochondria-related differential expressed genes**

| Term ID    | Term description                                                | FDR    | Genes                                                                                                                                                                                                                      |
|------------|-----------------------------------------------------------------|--------|----------------------------------------------------------------------------------------------------------------------------------------------------------------------------------------------------------------------------|
| GO:0021637 | trigeminal nerve structural organization                        | 0.0027 | NRP1,SEMA3A,SEMA3F                                                                                                                                                                                                         |
| GO:0036486 | ventral trunk neural crest cell migration                       | 0.0027 | NRP1,SEMA3A,SEMA3F                                                                                                                                                                                                         |
| GO:0097490 | sympathetic neuron projection extension                         | 0.0027 | NRP1,SEMA3A,SEMA3F                                                                                                                                                                                                         |
| GO:0097491 | sympathetic neuron projection guidance                          | 0.0027 | NRP1,SEMA3A,SEMA3F                                                                                                                                                                                                         |
| GO:1902287 | semaphorin-plexin signaling pathway involved in axon guidance   | 0.0027 | NRP1,SEMA3A,SEMA3F                                                                                                                                                                                                         |
| GO:0021612 | facial nerve structural organization                            | 0.0029 | NRP1,SEMA3A,SEMA3F                                                                                                                                                                                                         |
| GO:0021785 | branchiomotor neuron axon guidance                              | 0.0029 | NRP1,SEMA3A,SEMA3F                                                                                                                                                                                                         |
| GO:0001764 | neuron migration                                                | 0.0033 | ASPM,CELSR1,MARK1,MEF2C,NRP1,SEMA3A                                                                                                                                                                                        |
| GO:0014033 | neural crest cell differentiation                               | 0.0033 | FN1,MEF2C,NRP1,SEMA3A,SEMA3F                                                                                                                                                                                               |
| GO:0040012 | regulation of locomotion                                        | 0.0033 | CXCL2,DDR2,DLC1,EPB41L4B,FN1,LIMCH1,MCTP1,MEF2C,MYLK,NRP1,PIK3R1,RECK,SEMA3A,SEMA3F,SNCA                                                                                                                                   |
| GO:0048513 | animal organ development                                        | 0.0033 | ANK2,ASPM,BHLHE41,BICC1,CELSR1,COL5A2,COL9A3,CPS1,DDR2,DLC1,DOCK11,FN1,KRT81,LPIN1,LSR,MECOM,MEF2C,MGST1,MITF,MYLK,NFIB,NRP1,PIK3R1,PYGO1,SATB1,SEMA3A,SEMA3F,TACC1,VIM,ZEB1                                               |
| GO:0048731 | system development                                              | 0.0033 | ANK2,ASPM,BHLHE41,BICC1,CELSR1,COL5A2,COL9A3,CPS1,DDR2,DLC1,DOCK11,EFNA3,FAM126A,FN1,GPC2,HES4,KRT81,LPIN1,LSR,MARK1,MECOM,MEF2C,MGST1,MITF,MYLK,NAP1L2,NFIB,NRP1,PIK3R1,PYGO1,QKI,RECK,SATB1,SEMA3A,SEMA3F,TACC1,VIM,ZEB1 |
| GO:0048843 | negative regulation of axon extension involved in axon guidance | 0.0033 | NRP1,SEMA3A,SEMA3F                                                                                                                                                                                                         |
| GO:0048846 | axon extension involved in axon guidance                        | 0.0033 | NRP1,SEMA3A,SEMA3F                                                                                                                                                                                                         |
| GO:0051270 | regulation of cellular component movement                       | 0.0033 | ANK2,CXCL2,DDR2,DLC1,EPB41L4B,FN1,LIMCH1,MCTP1,MEF2C,MYLK,NRP1,PIK3R1,RECK,SEMA3A,SEMA3F                                                                                                                                   |
| GO:0060600 | dichotomous subdivision of an epithelial terminal unit          | 0.0033 | CELSR1,NRP1,SEMA3A                                                                                                                                                                                                         |
| GO:0061549 | sympathetic ganglion development                                | 0.0033 | NRP1,SEMA3A,SEMA3F                                                                                                                                                                                                         |

|            |                                                                        |        |                                                                                                                                                                                                                                                            |
|------------|------------------------------------------------------------------------|--------|------------------------------------------------------------------------------------------------------------------------------------------------------------------------------------------------------------------------------------------------------------|
| GO:0016043 | cellular component organization                                        | 0.0039 | ANK2,ASPM,BGN,CCDC136,COL5A2,COL9A3,DDR2,DLC1,EFNA3,EHHADH,EMP1,EPB41L4B,FGD4,FN1,H2AFJ,JADE1,KCTD12,LIMCH1,LPIN1,LSR,MAP7D3,MARK1,MECOM,MEF2C,MGST1,MITF,MYLK,NAP1L2,NFIB,NR3C1,NRP1,PADI3,PIK3R1,PYGO1,RECK,RHOQ,SATB1,SEMA3A,SEMA3F,SNCA,SYNM,TACC1,VIM |
| GO:0051271 | negative regulation of cellular component movement                     | 0.0046 | DLC1,LIMCH1,MCTP1,MEF2C,NRP1,RECK,SEMA3A,SEMA3F                                                                                                                                                                                                            |
| GO:0110020 | regulation of actomyosin structure organization                        | 0.0056 | DLC1,LIMCH1,MEF2C,NRP1,PIK3R1                                                                                                                                                                                                                              |
| GO:0040013 | negative regulation of locomotion                                      | 0.0058 | DLC1,LIMCH1,MCTP1,MEF2C,NRP1,RECK,SEMA3A,SEMA3F                                                                                                                                                                                                            |
| GO:0071417 | cellular response to organonitrogen compound                           | 0.0075 | CACNA2D1,COL5A2,CPS1,LPIN1,MEF2C,PIK3R1,RHOQ,SNCA,ZEB1,ZNF106                                                                                                                                                                                              |
| GO:0021828 | gonadotrophin-releasing hormone neuronal migration to the hypothalamus | 0.0076 | NRP1,SEMA3A                                                                                                                                                                                                                                                |
| GO:0045664 | regulation of neuron differentiation                                   | 0.0076 | ASPM,EFNA3,FN1,MARK1,MEF2C,NAP1L2,NRP1,SEMA3A,SEMA3F,VIM,ZEB1                                                                                                                                                                                              |
| GO:0051960 | regulation of nervous system development                               | 0.0076 | ASPM,CELSR1,EFNA3,FN1,MARK1,MEF2C,NAP1L2,NRP1,SEMA3A,SEMA3F,SNCA,VIM,ZEB1                                                                                                                                                                                  |
| GO:1903375 | facioacoustic ganglion development                                     | 0.0076 | NRP1,SEMA3A                                                                                                                                                                                                                                                |
| GO:0007275 | multicellular organism development                                     | 0.0077 | ANK2,ASPM,BHLHE41,BICC1,CELSR1,COL5A2,COL9A3,CPS1,DDR2,DLC1,DOCK11,EFNA3,EMP1,FAM126A,FN1,GPC2,HES4,KRT81,LPIN1,LSR,MARK1,MECOM,MEF2C,MGST1,MITF,MYLK,NAP1L2,NFIB,NRP1,PIK3R1,PYGO1,QKI,RECK,SATB1,SEMA3A,SEMA3F,TACC1,VIM,ZEB1                            |
| GO:0150020 | basal dendrite arborization                                            | 0.01   | NRP1,SEMA3A                                                                                                                                                                                                                                                |
| GO:0006928 | movement of cell or subcellular component                              | 0.0105 | ANK2,ASPM,CACNA2D1,CELSR1,CXCL2,DPP4,EFNA3,FN1,MARK1,MEF2C,NFIB,NRP1,PIK3R1,PROS1,SEMA3A,SEMA3F,VIM                                                                                                                                                        |
| GO:0032970 | regulation of actin filament-based process                             | 0.0106 | ANK2,CELSR1,DLC1,LIMCH1,MEF2C,NRP1,PIK3R1,RHOQ                                                                                                                                                                                                             |

|            |                                                                                |        |                                                                                                                                                                                                                                                                                        |
|------------|--------------------------------------------------------------------------------|--------|----------------------------------------------------------------------------------------------------------------------------------------------------------------------------------------------------------------------------------------------------------------------------------------|
| GO:0032501 | multicellular organismal process                                               | 0.0112 | ANK2,ASPM,BGN,BHLHE41,BICC1,CACNA2D1,CCDC136,CCDC50,CELSR1,COL5A2,COL9A3,CPS1,DDR2,DLCL1,DOCK11,DPP4,EFNA3,EMP1,FAM126A,FN1,GPAM,GPC2,HES4,KRT81,LPIN1,LSR,MARK1,MECOM,MEF2C,MGST1,MITF,MYLK,NAP1L2,NFIB,NRP1,PIK3R1,PROS1,PYGO1,QKI,RECK,SATB1,SEMA3A,SEMA3F,SNCA,SYNM,TACC1,VIM,ZEB1 |
| GO:0032502 | developmental process                                                          | 0.0113 | ANK2,ARHGEF28,ASPM,BHLHE41,BICC1,CCDC136,CELSR1,COL5A2,COL9A3,CPS1,DDR2,DLCL1,DOCK11,EFNA3,EMP1,FAM126A,FN1,GPC2,HES4,KRT81,LPIN1,LSR,MARK1,MECOM,MEF2C,MGST1,MITF,MYLK,NAP1L2,NFIB,NRP1,PIK3R1,PYGO1,QKI,RECK,SATB1,SEMA3A,SEMA3F,SNCA,TACC1,VIM,ZEB1                                 |
| GO:0061551 | trigeminal ganglion development                                                | 0.0122 | NRP1,SEMA3A                                                                                                                                                                                                                                                                            |
| GO:0023051 | regulation of signaling                                                        | 0.0128 | AKAP12,ANK2,ARHGEF28,ARHGEF40,ASPM,BGN,BICC1,CXCL2,DEPDC7,DLCL1,DPP4,FAM132A,FGD4,FN1,GPAM,GPC2,JADE1,MAP3K8,MCTP1,MDFIC,MECOM,MEF2C,NRP1,PIK3R1,PIP5K1B,RHOQ,SEMA3A,SEMA3F,SNCA,ZEB1                                                                                                  |
| GO:0048856 | anatomical structure development                                               | 0.0128 | ANK2,ASPM,BHLHE41,BICC1,CCDC136,CELSR1,COL5A2,COL9A3,CPS1,DDR2,DLCL1,DOCK11,EFNA3,EMP1,FAM126A,FN1,GPC2,HES4,KRT81,LPIN1,LSR,MARK1,MECOM,MEF2C,MGST1,MITF,MYLK,NAP1L2,NFIB,NRP1,PIK3R1,PYGO1,QKI,RECK,SATB1,SEMA3A,SEMA3F,TACC1,VIM,ZEB1                                               |
| GO:0050793 | regulation of developmental process                                            | 0.013  | ASPM,BHLHE41,CELSR1,COL5A2,DDR2,DLCL1,EFNA3,FGD4,FN1,GPAM,ISG15,MARK1,MEF2C,MITF,NAP1L2,NFIB,NRP1,PIK3R1,RHOQ,SEMA3A,SEMA3F,SNCA,VIM,ZEB1                                                                                                                                              |
| GO:0034764 | positive regulation of transmembrane transport                                 | 0.0131 | ANK2,CACNA2D1,FAM132A,PIK3R1,RHOQ,SNCA                                                                                                                                                                                                                                                 |
| GO:0007435 | salivary gland morphogenesis                                                   | 0.0141 | NFIB,NRP1,SEMA3A                                                                                                                                                                                                                                                                       |
| GO:0035023 | regulation of Rho protein signal transduction                                  | 0.0148 | ARHGEF28,ARHGEF40,DLCL1,FGD4,NRP1                                                                                                                                                                                                                                                      |
| GO:0051491 | positive regulation of filopodium assembly                                     | 0.0148 | DOCK11,NRP1,RHOQ                                                                                                                                                                                                                                                                       |
| GO:0060666 | dichotomous subdivision of terminal units involved in salivary gland branching | 0.0148 | NRP1,SEMA3A                                                                                                                                                                                                                                                                            |

|            |                                                         |        |                                                                                                                                                                                                                                                                                                                                                                                                                                                                                                                                                                                                     |
|------------|---------------------------------------------------------|--------|-----------------------------------------------------------------------------------------------------------------------------------------------------------------------------------------------------------------------------------------------------------------------------------------------------------------------------------------------------------------------------------------------------------------------------------------------------------------------------------------------------------------------------------------------------------------------------------------------------|
| GO:0016477 | cell migration                                          | 0.0159 | ASPM,CELSR1,CXCL2,DPP4,FN1,MARK1,MEF2C,NRP1,PIK3R1,PROS1,SEMA3A,SEMA3F                                                                                                                                                                                                                                                                                                                                                                                                                                                                                                                              |
| GO:0032956 | regulation of actin cytoskeleton organization           | 0.0175 | CELSR1,DLC1,LIMCH1,MEF2C,NRP1,PIK3R1,RHOQ                                                                                                                                                                                                                                                                                                                                                                                                                                                                                                                                                           |
| GO:0051492 | regulation of stress fiber assembly                     | 0.0175 | DLC1,LIMCH1,NRP1,PIK3R1                                                                                                                                                                                                                                                                                                                                                                                                                                                                                                                                                                             |
| GO:0060385 | axonogenesis involved in innervation                    | 0.0175 | NRP1,SEMA3A                                                                                                                                                                                                                                                                                                                                                                                                                                                                                                                                                                                         |
| GO:0007010 | cytoskeleton organization                               | 0.0179 | ANK2,ASPM,DLC1,EPB41L4B,FGD4,LIMCH1,MAP7D3,MARK1,NRP1,RHOQ,SYNM,TACC1,VIM                                                                                                                                                                                                                                                                                                                                                                                                                                                                                                                           |
| GO:0030029 | actin filament-based process                            | 0.0179 | ANK2,CACNA2D1,DLC1,EPB41L4B,FGD4,LIMCH1,NRP1,RHOQ,VIM                                                                                                                                                                                                                                                                                                                                                                                                                                                                                                                                               |
| GO:0007411 | axon guidance                                           | 0.0198 | EFNA3,NFIB,NRP1,PIK3R1,SEMA3A,SEMA3F                                                                                                                                                                                                                                                                                                                                                                                                                                                                                                                                                                |
| GO:0006644 | phospholipid metabolic process                          | 0.02   | FAM126A,GPAM,ISYNA1,LPIN1,PIK3R1,PIP5K1B,SERINC2,SNCA                                                                                                                                                                                                                                                                                                                                                                                                                                                                                                                                               |
| GO:0030516 | regulation of axon extension                            | 0.02   | FN1,NRP1,SEMA3A,SEMA3F                                                                                                                                                                                                                                                                                                                                                                                                                                                                                                                                                                              |
| GO:0001667 | ameboidal-type cell migration                           | 0.0201 | DPP4,FN1,NRP1,SEMA3A,SEMA3F                                                                                                                                                                                                                                                                                                                                                                                                                                                                                                                                                                         |
| GO:0051056 | regulation of small GTPase mediated signal transduction | 0.0201 | ARHGEF28,ARHGEF40,DEPDC7,DLC1,FGD4,NRP1,RHOQ                                                                                                                                                                                                                                                                                                                                                                                                                                                                                                                                                        |
| GO:0009966 | regulation of signal transduction                       | 0.0206 | AKAP12,ARHGEF28,ARHGEF40,ASPM,BGN,BICC1,CXCL2,DEPDC7,DLC1,FAM132A,FGD4,FN1,GPAM,GPC2,JADE1,MAP3K8,MDFIC,MECOM,MEF2C,NRP1,PIK3R1,PIP5K1B,RHOQ,SEMA3A,SEMA3F,SNCA,ZEB1                                                                                                                                                                                                                                                                                                                                                                                                                                |
| GO:0006638 | neutral lipid metabolic process                         | 0.0217 | CPS1,GPAM,LPIN1,SNCA                                                                                                                                                                                                                                                                                                                                                                                                                                                                                                                                                                                |
| GO:0009987 | cellular process                                        | 0.0241 | AKAP12,ANK2,ARHGEF28,ASPM,BGN,BHLHE41,CACNA2D1,CCDC136,CELSR1,CHTF18, COL5A2, COL9A3, CPS1, CXCL2, DDR2, DEPDC7, DLC1, DOCK11, DPP4, DSEL, EFNA3, EHHADH, EMP1, EPB41L4B, FAM126A, FGD4, FIGN, FN1, GPAM, GPC2, H2AFJ, HES4, ISG15, ISYNA1, JADE1, KCTD12, KRT81, LIMCH1, LPIN1, LRCH2, LSR, MAP3K8, MAP7D3, MARK1, MBNL2, MCTP1, MDFIC, MECOM, MEF2C, MGST1, MITF, MSRB3, MYLK, NAP1L2, NFIB, NR3C1, NR3C2, NRP1, NXPH4, OASL, PADI3, PARD3B, PIK3R1, PIP5K1B, PROS1, PTPN21, PYGO1, QKI, RECK, RHOQ, SACS, SATB1, SEMA3A, SEMA3F, SERINC2, SNCA, SYNM, TACC1, VIM, VKORC1L1, ZDHHC2, ZEB1, ZNF106 |

|            |                                                        |        |                                                                                                                                                                                                                        |
|------------|--------------------------------------------------------|--------|------------------------------------------------------------------------------------------------------------------------------------------------------------------------------------------------------------------------|
| GO:0010604 | positive regulation of macromolecule metabolic process | 0.0246 | ANK2,CHTF18,DDR2,DLC1,EFNA3,EPB41L4B,FN1,JADE1,LIMCH1,LPIN1,MAP3K8,MDFIC,MECOM,MEF2C,MITF,NAP1L2,NFIB,NR3C1,NRP1,PIK3R1,PYGO1,QKI,RHOQ,SEMA3A,SNCA,VIM,ZEB1                                                            |
| GO:0030336 | negative regulation of cell migration                  | 0.0248 | DLC1,LIMCH1,MCTP1,MEF2C,RECK,SEMA3A                                                                                                                                                                                    |
| GO:0040011 | locomotion                                             | 0.0262 | ASPM,CELSR1,CXCL2,DPP4,EFNA3,FN1,MARK1,MEF2C,NFIB,NRP1,PIK3R1,PROS1,SEMA3A,SEMA3F                                                                                                                                      |
| GO:0051128 | regulation of cellular component organization          | 0.0267 | CELSR1,DDR2,DLC1,DOCK11,DPP4,FGD4,FN1,JADE1,LIMCH1,MARK1,MCTP1,MEF2C,MITF,NAP1L2,NRP1,PIK3R1,RHOQ,SACS,SEMA3A,SEMA3F,SNCA,VIM                                                                                          |
| GO:1901701 | cellular response to oxygen-containing compound        | 0.0278 | CACNA2D1,COL5A2,CPS1,LPIN1,MEF2C,MGST1,NR3C1,PIK3R1,RHOQ,SNCA,ZEB1,ZNF106                                                                                                                                              |
| GO:0046326 | positive regulation of glucose import                  | 0.0293 | FAM132A,PIK3R1,RHOQ                                                                                                                                                                                                    |
| GO:2000026 | regulation of multicellular organismal development     | 0.0298 | ASPM,CELSR1,COL5A2,DDR2,EFNA3,FN1,ISG15,MARK1,MEF2C,MITF,NAP1L2,NFIB,NRP1,PIK3R1,SEMA3A,SEMA3F,SNCA,VIM,ZEB1                                                                                                           |
| GO:0032060 | bleb assembly                                          | 0.0301 | EMP1,MYLK                                                                                                                                                                                                              |
| GO:0071679 | commissural neuron axon guidance                       | 0.0301 | NFIB,NRP1                                                                                                                                                                                                              |
| GO:0048522 | positive regulation of cellular process                | 0.0315 | AKAP12,ANK2,ASPM,CHTF18,CXCL2,DDR2,DLC1,DOCK11,DPP4,EFNA3,EPB41L4B,FAM132A,FGD4,FN1,GPAM,ISG15,JADE1,LIMCH1,LPIN1,MAP3K8,MDFIC,MECOM,MEF2C,MITF,MYLK,NAP1L2,NFIB,NR3C1,NRP1,PIK3R1,PYGO1,QKI,RHOQ,SEMA3A,SNCA,VIM,ZEB1 |
| GO:0030335 | positive regulation of cell migration                  | 0.032  | CXCL2,DDR2,EPB41L4B,FN1,MYLK,NRP1,PIK3R1,SEMA3A                                                                                                                                                                        |
| GO:0007399 | nervous system development                             | 0.0324 | ANK2,ASPM,CELSR1,DLC1,EFNA3,FAM126A,FN1,GPC2,HES4,MARK1,MEF2C,NAP1L2,NFIB,NRP1,PIK3R1,QKI,SEMA3A,SEMA3F,TACCI,VIM,ZEB1                                                                                                 |

|            |                                                                    |        |                                                                                                                                                                                                                    |
|------------|--------------------------------------------------------------------|--------|--------------------------------------------------------------------------------------------------------------------------------------------------------------------------------------------------------------------|
| GO:0007165 | signal transduction                                                | 0.0331 | AKAP12,ANK2,ARHGEF28,BGN,CELSR1,CXCL2,DDR2,DEPDC7,DLC1,DOCK11,EFNA3,FGD4,FN1,GPC2,ISG15,LRCH2,MAP3K8,MARK1,MCTP1,MDFIC,MEF2C,MITF,NR3C1,NR3C2,NRP1,NXPH4,OASL,PIK3R1,PYGO1,RHOQ,SEMA3A,SEMA3F,SNCA,VIM,ZEB1,ZNF106 |
| GO:1902531 | regulation of intracellular signal transduction                    | 0.0339 | AKAP12,ARHGEF28,ARHGEF40,BGN,DEPDC7,DLC1,FAM132A,FGD4,FN1,MAP3K8,MDFIC,MECOM,MEF2C,NRP1,PIK3R1,PIP5K1B,RHOQ,SEMA3A                                                                                                 |
| GO:0001952 | regulation of cell-matrix adhesion                                 | 0.0352 | DLC1,LIMCH1,NRP1,PIK3R1                                                                                                                                                                                            |
| GO:0048583 | regulation of response to stimulus                                 | 0.0362 | AKAP12,ARHGEF28,ARHGEF40,ASPM,BGN,BICC1,CXCL2,DEPDC7,DLC1,FAM132A,FGD4,FIGN,FN1,GPAM,GPC2,JADE1,MAP3K8,MCTP1,MDFIC,MECOM,MEF2C,MYLK,NRP1,PIK3R1,PIP5K1B,PROS1,RHOQ,SEMA3A,SEMA3F,SNCA,ZEB1                         |
| GO:0030208 | dermatan sulfate biosynthetic process                              | 0.0369 | BGN,DSEL                                                                                                                                                                                                           |
| GO:0044255 | cellular lipid metabolic process                                   | 0.037  | CPS1,EHHADH,FAM126A,GPAM,GPC2,ISYNA1,LPIN1,PIK3R1,PIP5K1B,QKI,SERINC2,SNCA                                                                                                                                         |
| GO:0021987 | cerebral cortex development                                        | 0.0385 | ASPM,NRP1,SEMA3A,TACC1                                                                                                                                                                                             |
| GO:0051493 | regulation of cytoskeleton organization                            | 0.0407 | CELSR1,DLC1,LIMCH1,MEF2C,NRP1,PIK3R1,RHOQ,SNCA                                                                                                                                                                     |
| GO:0022603 | regulation of anatomical structure morphogenesis                   | 0.0408 | CELSR1,COL5A2,DLC1,EFNA3,FGD4,FN1,MEF2C,NFIB,NRP1,RHOQ,SEMA3A,SEMA3F                                                                                                                                               |
| GO:0030205 | dermatan sulfate metabolic process                                 | 0.0408 | BGN,DSEL                                                                                                                                                                                                           |
| GO:0031295 | T cell costimulation                                               | 0.0408 | DPP4,MAP3K8,PIK3R1                                                                                                                                                                                                 |
| GO:0010810 | regulation of cell-substrate adhesion                              | 0.0413 | DLC1,FN1,LIMCH1,NRP1,PIK3R1                                                                                                                                                                                        |
| GO:0045785 | positive regulation of cell adhesion                               | 0.0413 | DPP4,EPB41L4B,FN1,GPAM,MAP3K8,NRP1,PIK3R1                                                                                                                                                                          |
| GO:0051241 | negative regulation of multicellular organismal process            | 0.0413 | ASPM,COL5A2,EFNA3,FN1,ISG15,MEF2C,NFIB,NRP1,PIK3R1,PROS1,SEMA3A,SEMA3F,VIM                                                                                                                                         |
| GO:0032989 | cellular component morphogenesis                                   | 0.0427 | ANK2,CCDC136,EFNA3,FN1,MEF2C,NFIB,NRP1,PIK3R1,SEMA3A,SEMA3F                                                                                                                                                        |
| GO:0051928 | positive regulation of calcium ion transport                       | 0.0427 | ANK2,CACNA2D1,MYLK,SNCA                                                                                                                                                                                            |
| GO:0120035 | regulation of plasma membrane bounded cell projection organization | 0.0427 | DOCK11,FN1,MARK1,MEF2C,NRP1,RHOQ,SEMA3A,SEMA3F,VIM                                                                                                                                                                 |

|            |                                                            |        |                                                                                                                                                                                                                                                                   |
|------------|------------------------------------------------------------|--------|-------------------------------------------------------------------------------------------------------------------------------------------------------------------------------------------------------------------------------------------------------------------|
| GO:0046928 | regulation of neurotransmitter secretion                   | 0.0442 | MCTP1,MEF2C,SNCA                                                                                                                                                                                                                                                  |
| GO:0051173 | positive regulation of nitrogen compound metabolic process | 0.0447 | CHTF18,DDR2,DLC1,EFNA3,FN1,JADE1,LIMCH1,LPIN1,MAP3K8,MDFIC,MECOM,MEF2C,MITF,NAP1L2,NFIB,NR3C1,NRP1,PIK3R1,PYGO1,QKI,RHOQ,SEMA3A,SNCA,VIM,ZEB1                                                                                                                     |
| GO:0000904 | cell morphogenesis involved in differentiation             | 0.0453 | EFNA3,FN1,MEF2C,NFIB,NRP1,PIK3R1,SEMA3A,SEMA3F                                                                                                                                                                                                                    |
| GO:0010715 | regulation of extracellular matrix disassembly             | 0.0453 | DDR2,DPP4                                                                                                                                                                                                                                                         |
| GO:0035239 | tube morphogenesis                                         | 0.0453 | CELSR1,DLC1,FN1,MEF2C,MYLK,NFIB,NRP1,QKI,ZEB1                                                                                                                                                                                                                     |
| GO:0045595 | regulation of cell differentiation                         | 0.0453 | ASPM,BHLHE41,COL5A2,DDR2,EFNA3,FN1,ISG15,MARK1,MEF2C,MITF,NAP1L2,NRP1,PIK3R1,SEMA3A,SEMA3F,VIM,ZEB1                                                                                                                                                               |
| GO:0051239 | regulation of multicellular organismal process             | 0.0453 | ANK2,ASPM,CACNA2D1,CELSR1,COL5A2,DDR2,EFNA3,EPB41L4B,FN1,GPAM,ISG15,MARK1,MEF2C,MITF,NAP1L2,NFIB,NRP1,PIK3R1,PROS1,SEMA3A,SEMA3F,SNCA,VIM,ZEB1                                                                                                                    |
| GO:0051893 | regulation of focal adhesion assembly                      | 0.0453 | DLC1,LIMCH1,NRP1                                                                                                                                                                                                                                                  |
| GO:1901653 | cellular response to peptide                               | 0.0453 | CACNA2D1,CPS1,LPIN1,PIK3R1,RHOQ,ZNF106                                                                                                                                                                                                                            |
| GO:0003012 | muscle system process                                      | 0.0455 | ANK2,CACNA2D1,MEF2C,MYLK,SYNM,VIM                                                                                                                                                                                                                                 |
| GO:0051716 | cellular response to stimulus                              | 0.0475 | AKAP12,ANK2,ARHGEF28,BGN,CACNA2D1,CELSR1,COL5A2,CPS1,CXCL2,DDR2,DEPDC7,DLC1,DOCK11,EFNA3,FGD4,FN1,GPC2,ISG15,LPIN1,LRCH2,MAP3K8,MARK1,MCTP1,MDFIC,MEF2C,MGST1,MITF,MYLK,NR3C1,NR3C2,NRP1,NXPH4,OASL,PIK3R1,PYGO1,RHOQ,SEMA3A,SEMA3F,SNCA,VIM,VKORC1L1,ZEB1,ZNF106 |
| GO:0010243 | response to organonitrogen compound                        | 0.048  | CACNA2D1,COL5A2,CPS1,LPIN1,MEF2C,MGST1,PIK3R1,RHOQ,SNCA,ZEB1,ZNF106                                                                                                                                                                                               |
| GO:0023052 | signaling                                                  | 0.048  | AKAP12,ANK2,ARHGEF28,BGN,CACNA2D1,CELSR1,CXCL2,DDR2,DEPDC7,DLC1,DOCK11,EFNA3,FGD4,FN1,GPC2,ISG15,LRCH2,MAP3K8,MARK1,MCTP1,MDFIC,MEF2C,MITF,NR3C1,NR3C2,NRP1,NXPH4,OASL,PIK3R1,PYGO1,RHOQ,SEMA3A,SEMA3F,SNCA,VIM,ZEB1,ZNF106                                       |
| GO:0030155 | regulation of cell adhesion                                | 0.048  | DLC1,DPP4,EPB41L4B,FN1,GPAM,LIMCH1,MAP3K8,NRP1,PIK3R1                                                                                                                                                                                                             |



|            |                                                           |        |                                                                                                                                                                           |
|------------|-----------------------------------------------------------|--------|---------------------------------------------------------------------------------------------------------------------------------------------------------------------------|
| GO:0030198 | extracellular matrix organization                         | 0.048  | BGN,COL5A2,COL9A3,DDR2,FN1,RECK                                                                                                                                           |
| GO:0045665 | negative regulation of neuron differentiation             | 0.048  | ASPM,NRP1,SEMA3A,SEMA3F,VIM                                                                                                                                               |
| GO:0046486 | glycerolipid metabolic process                            | 0.048  | CPS1,FAM126A,GPAM,LPIN1,PIK3R1,PIP5K1B,SERINC2                                                                                                                            |
| GO:0048667 | cell morphogenesis involved in neuron differentiation     | 0.048  | EFNA3,MEF2C,NFIB,NRP1,PIK3R1,SEMA3A,SEMA3F                                                                                                                                |
| GO:0048699 | generation of neurons                                     | 0.048  | ASPM,CELSR1,EFNA3,FN1,GPC2,MARK1,MEF2C,NAP1L2,NFIB,NRP1,PIK3R1,SEMA3A,SEMA3F,VIM,ZEB1                                                                                     |
| GO:0065009 | regulation of molecular function                          | 0.048  | ANK2,ARHGEF28,ARHGEF40,BGN,CACNA2D1,CHTF18,CXCL2,DDR2,DEPDC7,DLC1,DOCK11,EFNA3,FAM132A,FGD4,FN1,MAP3K8,MDFIC,MEF2C,NFIB,NRP1,PIK3R1,PROS1,RECK,SEMA3A,SEMA3F,SERINC2,SNCA |
| GO:0051129 | negative regulation of cellular component organization    | 0.0489 | DLC1,DPP4,MCTP1,NRP1,SACS,SEMA3A,SEMA3F,SNCA,VIM                                                                                                                          |
| GO:0048638 | regulation of developmental growth                        | 0.0494 | FN1,GPAM,MEF2C,NRP1,SEMA3A,SEMA3F                                                                                                                                         |
| GO:0030318 | melanocyte differentiation                                | 0.0498 | MEF2C,MITF                                                                                                                                                                |
| GO:0086012 | membrane depolarization during cardiac muscle cell action | 0.0498 | ANK2,CACNA2D1                                                                                                                                                             |

**Table S2 Enrichment analysis of Modules**

| Category | Term ID    | Term description                                                             | FDR      | Genes                    |
|----------|------------|------------------------------------------------------------------------------|----------|--------------------------|
| Module 1 | GO:0048843 | negative regulation of axon extension involved in axon guidance              | 3.66E-08 | NRP1,SEMA3A,SEMA3F       |
|          | GO:0048846 | axon extension involved in axon guidance                                     | 3.66E-08 | NRP1,SEMA3A,SEMA3F       |
|          | GO:0061549 | sympathetic ganglion development                                             | 3.66E-08 | NRP1,SEMA3A,SEMA3F       |
|          | GO:0097490 | sympathetic neuron projection extension                                      | 3.66E-08 | NRP1,SEMA3A,SEMA3F       |
|          | GO:0097491 | sympathetic neuron projection guidance                                       | 3.66E-08 | NRP1,SEMA3A,SEMA3F       |
|          | GO:1901166 | neural crest cell migration involved in autonomic nervous system development | 3.66E-08 | NRP1,SEMA3A,SEMA3F       |
|          | GO:1902287 | semaphorin-plexin signaling pathway involved in axon guidance                | 3.66E-08 | NRP1,SEMA3A,SEMA3F       |
|          | GO:0007411 | axon guidance                                                                | 2.81E-07 | EFNA3,NRP1,SEMA3A,SEMA3F |
|          | GO:0021828 | gonadotrophin-releasing hormone neuronal migration to the hypothalamus       | 2.10E-06 | NRP1,SEMA3A              |
|          | GO:1903375 | facioacoustic ganglion development                                           | 2.10E-06 | NRP1,SEMA3A              |
|          | GO:0150020 | basal dendrite arborization                                                  | 2.93E-06 | NRP1,SEMA3A              |

|          |            |                                                                                |          |                          |
|----------|------------|--------------------------------------------------------------------------------|----------|--------------------------|
|          | GO:0061551 | trigeminal ganglion development                                                | 3.68E-06 | NRP1,SEMA3A              |
|          | GO:0060666 | dichotomous subdivision of terminal units involved in salivary gland branching | 4.82E-06 | NRP1,SEMA3A              |
|          | GO:0045664 | regulation of neuron differentiation                                           | 6.05E-06 | EFNA3,NRP1,SEMA3A,SEMA3F |
|          | GO:0060385 | axonogenesis involved in innervation                                           | 6.05E-06 | NRP1,SEMA3A              |
|          | GO:0051093 | negative regulation of developmental process                                   | 2.55E-05 | EFNA3,NRP1,SEMA3A,SEMA3F |
|          | GO:0022603 | regulation of anatomical structure morphogenesis                               | 3.08E-05 | EFNA3,NRP1,SEMA3A,SEMA3F |
|          | GO:0007413 | axonal fasciculation                                                           | 4.05E-05 | NRP1,SEMA3A              |
|          | GO:0051241 | negative regulation of multicellular organismal process                        | 4.84E-05 | EFNA3,NRP1,SEMA3A,SEMA3F |
|          | GO:0050919 | negative chemotaxis                                                            | 8.87E-05 | SEMA3A,SEMA3F            |
|          | GO:0010469 | regulation of signaling receptor activity                                      | 0.00037  | NRP1,SEMA3A,SEMA3F       |
|          | GO:0007166 | cell surface receptor signaling pathway                                        | 0.00055  | EFNA3,NRP1,SEMA3A,SEMA3F |
|          | GO:0018108 | peptidyl-tyrosine phosphorylation                                              | 0.0018   | EFNA3,NRP1               |
|          | GO:0010632 | regulation of epithelial cell migration                                        | 0.0021   | NRP1,SEMA3A              |
|          | GO:0065009 | regulation of molecular function                                               | 0.0025   | EFNA3,NRP1,SEMA3A,SEMA3F |
|          | GO:0045765 | regulation of angiogenesis                                                     | 0.0035   | EFNA3,NRP1               |
|          | GO:0032270 | positive regulation of cellular protein metabolic process                      | 0.0049   | EFNA3,NRP1,SEMA3A        |
|          | GO:0048880 | sensory system development                                                     | 0.0053   | NRP1,SEMA3A              |
|          | GO:0050769 | positive regulation of neurogenesis                                            | 0.0077   | NRP1,SEMA3A              |
|          | GO:0030335 | positive regulation of cell migration                                          | 0.0086   | NRP1,SEMA3A              |
|          | GO:0007169 | transmembrane receptor protein tyrosine kinase signaling pathway               | 0.0101   | EFNA3,NRP1               |
|          | GO:0043410 | positive regulation of MAPK cascade                                            | 0.0105   | NRP1,SEMA3A              |
|          | GO:0051345 | positive regulation of hydrolase activity                                      | 0.0203   | EFNA3,NRP1               |
|          | GO:0007267 | cell-cell signaling                                                            | 0.0378   | EFNA3,NRP1               |
| Module 3 | GO:0043010 | camera-type eye development                                                    | 0.0253   | VIM,ZEB1                 |
|          | GO:0010975 | regulation of neuron projection development                                    | 0.0316   | FN1,VIM                  |
|          | GO:0002376 | immune system process                                                          | 0.0317   | FN1,VIM,ZEB1             |
|          | GO:0048598 | embryonic morphogenesis                                                        | 0.0338   | FN1,ZEB1                 |
|          | GO:0035239 | tube morphogenesis                                                             | 0.0382   | FN1,ZEB1                 |
|          | GO:0044403 | symbiont process                                                               | 0.0386   | FN1,VIM                  |

|            |                                                            |         |              |
|------------|------------------------------------------------------------|---------|--------------|
| GO:0048513 | animal organ development                                   | 0.0387  | FN1,VIM,ZEB1 |
| GO:0051173 | positive regulation of nitrogen compound metabolic process | 0.0387  | FN1,VIM,ZEB1 |
| GO:0045596 | negative regulation of cell differentiation                | 0.0393  | VIM,ZEB1     |
| GO:0031325 | positive regulation of cellular metabolic process          | 0.0409  | FN1,VIM,ZEB1 |
| GO:0008022 | protein C-terminus binding                                 | 0.0181  | FN1,VIM      |
| hsa05206   | MicroRNAs in cancer                                        | 0.00071 | VIM,ZEB1     |

---

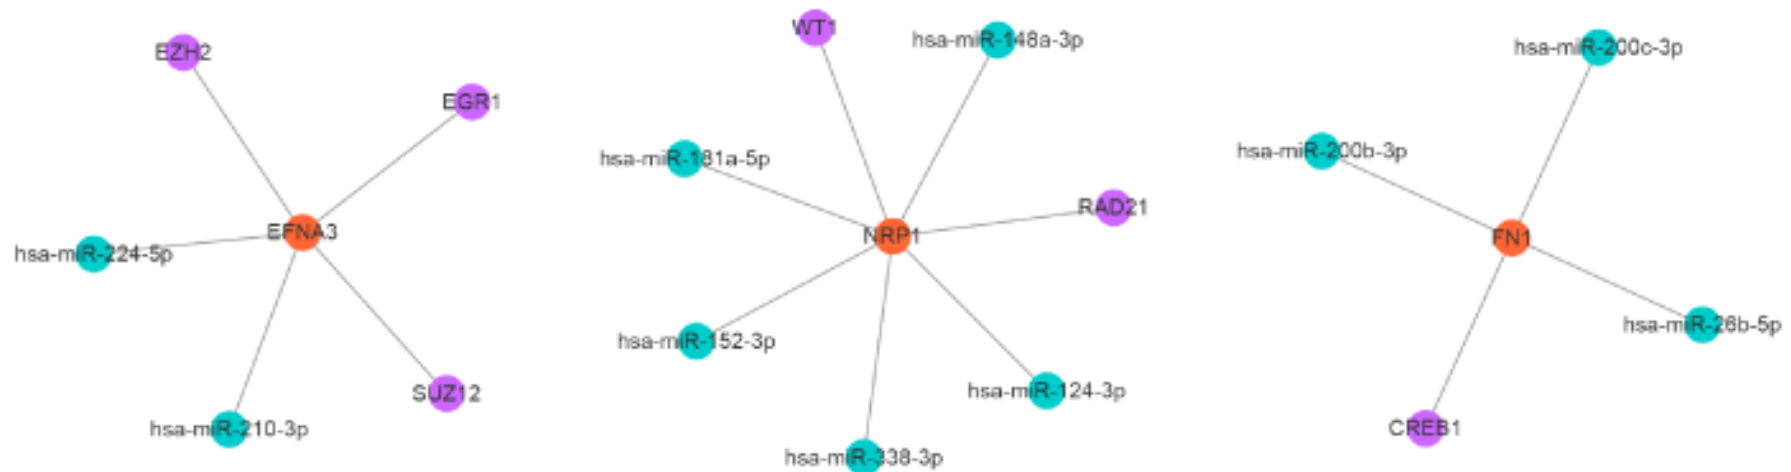

**Figure S1: Validation of TF-miRNA-Hub mrDEGs network with starBase database (<http://starbase.sysu.edu.cn/starbase2/index.php>) and ChEA database with NetworkAnalyst (<https://www.networkanalyst.ca/>). Red color represented mrDEGs. Blue color represented microRNA and purple color represented TF.mrDEGs, mitochondria-related differential expressed genes; TF, transcription factor.**
